# Supplementary material for: Fluorescent nanocellulose derived from Plectranthus barbatus for the selective detection of Pb(ii) ions in aqueous solutions
Source: Royal Society of Chemistry journal article supplement (doi:10.1039/d5na01139f), 2026-04-24
Supplement: d5na01139f1.pdf [file d5na01139f1.pdf]

## Supplementary Information

### Fluorescent Nanocellulose Derived from *Plectranthus barbatus* for the Selective Detection of Pb (II) Ions in Aqueous Solutions

Joshua Jose, Aishwarya Joji Mathew, Elizabeth Gabriel, Ancilin James and Vinod T. P.\*

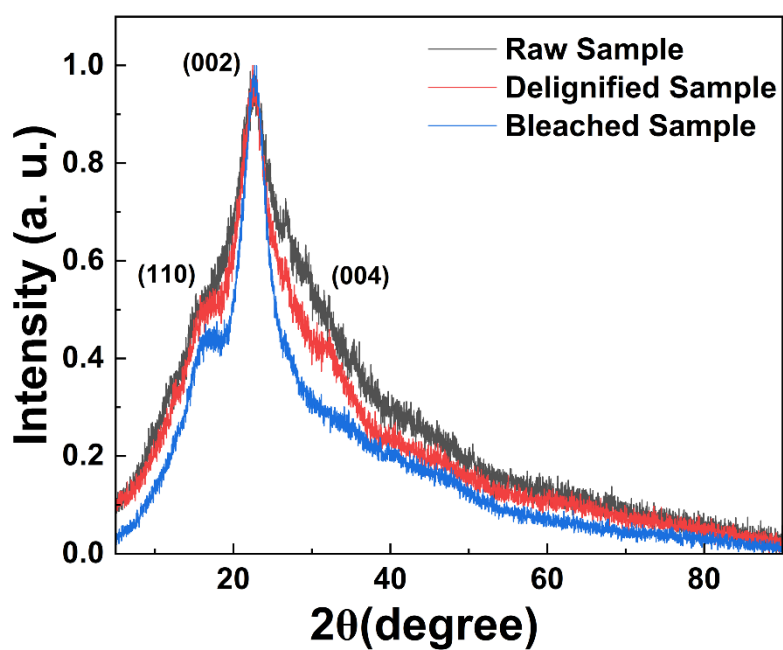

Fig. S1. XRD plot of the different synthesis stages of PBNC.

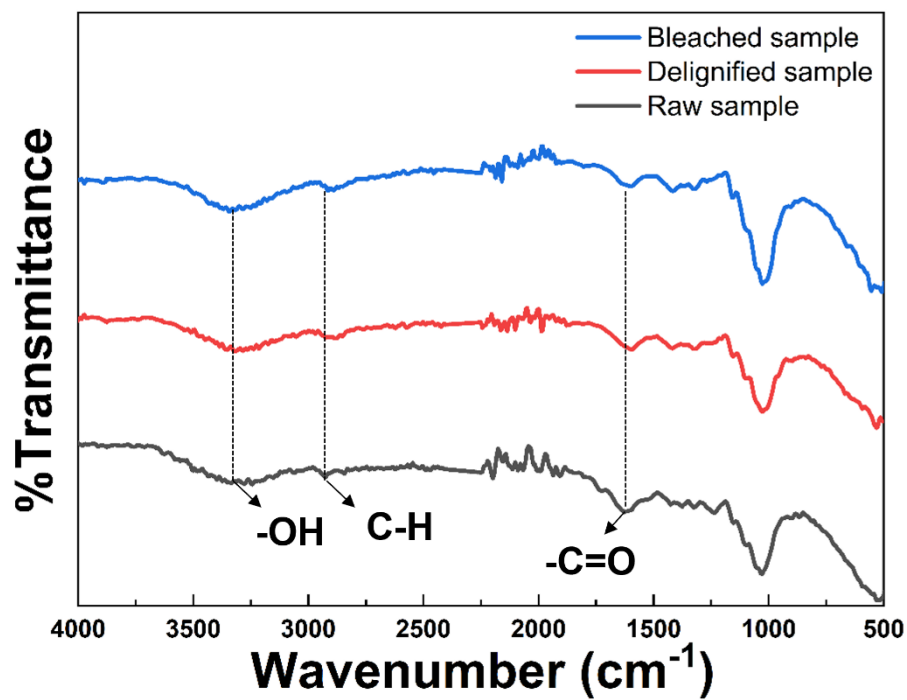

Fig. S2. FTIR plot of different synthesis stages of PBNC.

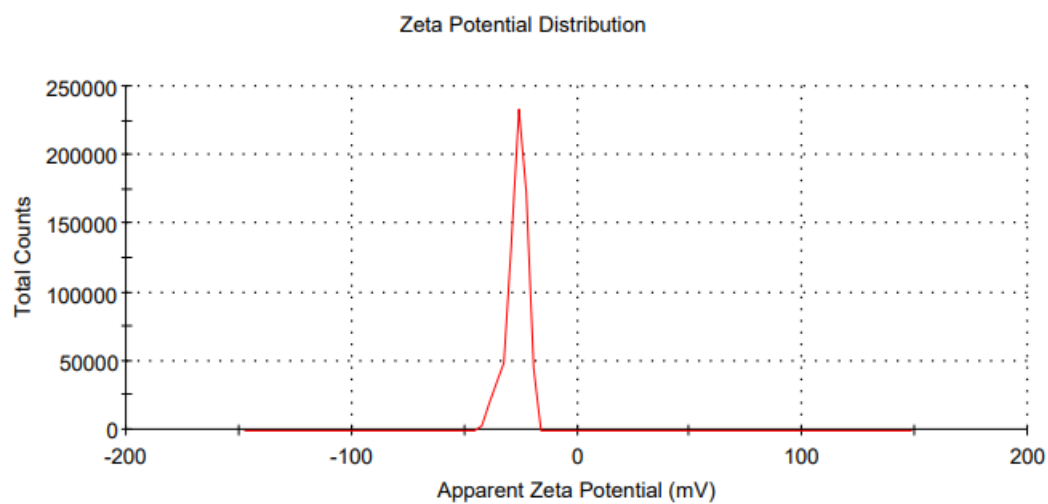

Fig. S3. Zeta potential graph of PBNC.

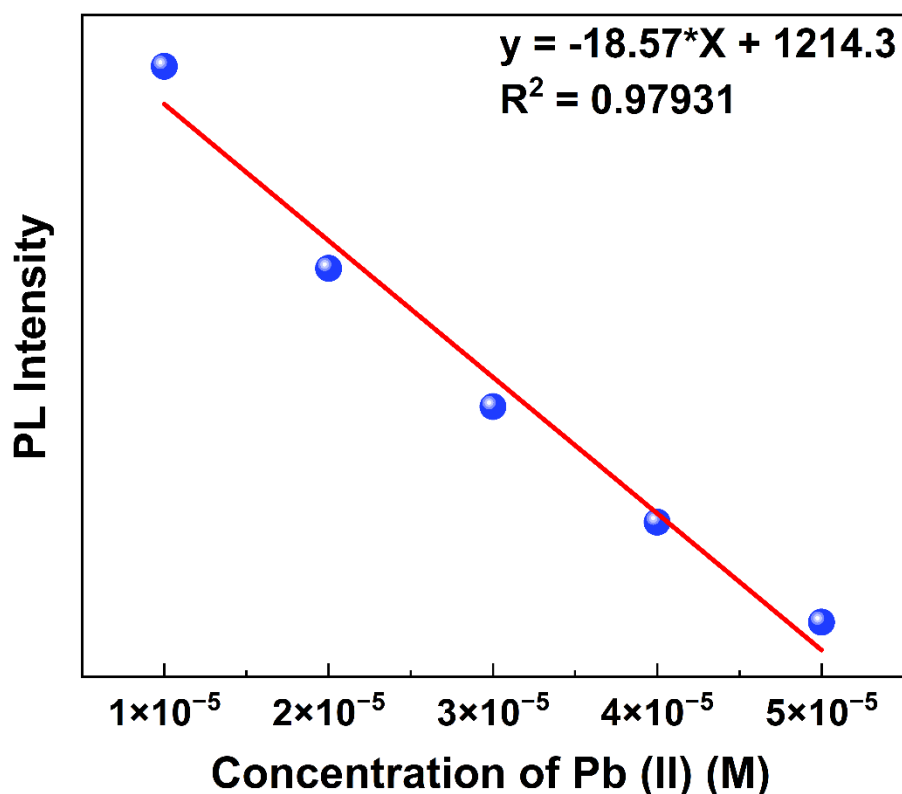

**Fig. S4.** Linear fit graph of concentration of Pb(II) versus PL intensity for tap water. For PL measurement, 20  $\mu\text{L}$  of Pb(II) solution of different concentrations (10, 20, 30, 40, and 50  $\mu\text{L}$ ) was added to the 3 mL of the water samples.

**Table S1.** List of nanocellulose based sensing platforms.

| Sl. No. | Sensing platform    | Sensing function | Metal ion detected | Role of Nanocellulose | Sensor material | LOD                | Reference |
|---------|---------------------|------------------|--------------------|-----------------------|-----------------|--------------------|-----------|
| 1.      | AANI-labelled TOCNC | Optical          | Pb                 | Carrier               | AANI            | 0.15 $\mu\text{M}$ | [1]       |
| 2.      | Py-CNC              | Optical          | Fe                 | Matrix                | Py              | 1 $\mu\text{M}$    | [2]       |
| 3.      | TOCNF-CQD           | Optical          | Fe                 | Substrate             | CQD             | 10 $\mu\text{M}$   | [3]       |

|    |                      |                 |    |                |                  |           |           |
|----|----------------------|-----------------|----|----------------|------------------|-----------|-----------|
| 4. | SnO <sub>2</sub> -BC | Electrochemical | Ni | Matrix         | SnO <sub>2</sub> | -         | [4]       |
| 5. | PA6/CNW/rGO          | Electrochemical | Hg | Reducing agent | PA6              | 0.0052 μM | [5]       |
| 6. | PBNC                 | Optical         | Pb | Sensor         | NC               | 2.7 nM    | This work |

## References

- 1 R. Song, Q. Zhang, Y. Chu, L. Zhang, H. Dai and W. Wu, *Cellulose*, 2019, **26**, 9553–9565.
- 2 M. Zhang, L. Zhang, H. Tian and A. Lu, *Carbohydrate Polymers*, 2020, **236**, 116037.
- 3 B. Xue, Y. Yang, R. Tang, Y. Sun, S. Sun, X. Cao, P. Li, Z. Zhang and X. Li, *Cellulose*, 2020, **27**, 729–742.
- 4 L. Sakwises, N. Rodthongkum and S. Ummartyotin, *Journal of Molecular Liquids*, 2017, **248**, 246–252.
- 5 K. B. R. Teodoro, F. L. Migliorini, M. H. M. Facure and D. S. Correa, *Carbohydrate Polymers*, 2019, **207**, 747–754.
